1 **Mass drug administration to reduce malaria incidence in a low-to-moderate**  
2 **endemic setting: short-term impact results from a cluster randomised**  
3 **controlled trial in Senegal**

4 **Authors:**

5 El-hadji Ba Konko Ciré, PhD<sup>1\*</sup>, Michelle E. Roh, PhD<sup>2,3\*</sup>, Abdoulaye Diallo, MD<sup>1</sup>, Tidiane  
6 Gadiaga, MD<sup>4</sup>, Amadou Seck, MS<sup>1</sup>, Sylla Thiam, MD<sup>1</sup>, Seynabou Gaye, MD<sup>5</sup>, Ibrahima Diallo,  
7 PharmD<sup>5</sup>, Aminata Colle Lo, PhD<sup>1</sup>, Elhadji Diouf, MPH<sup>1</sup>, Omar Gallo Ba, MD<sup>1</sup>, Alioune Badara  
8 Gueye, MD<sup>6</sup>, Ari Fogelson, MSc<sup>7</sup>, Xue Wu, MMed<sup>2,3</sup>, Prof Paul Milligan, PhD<sup>7</sup>, Tabitha Kibuka,  
9 MPH<sup>2</sup>, Moustapha Hama, MHA<sup>2</sup>, Erin Eckert, PhD<sup>2</sup>, Julie Thwing, MD<sup>8</sup>, Adam Bennett, PhD<sup>2,9</sup>,  
10 Prof Roly Gosling, MD<sup>2,3,10</sup>, Jimee Hwang, MD<sup>11,12</sup>, Doudou Sene, MD<sup>5</sup>, Fatou Ba, PhD<sup>5</sup>, Bayal  
11 Cissé, MD<sup>4</sup>, Katharine Sturm-Ramirez, PhD<sup>13</sup>, Michelle S. Hsiang, MD<sup>2,3†</sup>, Prof Jean Louis  
12 Ndiaye, MD<sup>1†</sup>

13 **Author Affiliations:**

14 <sup>1</sup> Université Iba Der Thiam de Thiès, Thiès, Senegal  
15 <sup>2</sup> US President's Malaria Initiative Impact Malaria, Washington DC, USA  
16 <sup>3</sup> Institute for Global Health Sciences, University of California, San Francisco, USA  
17 <sup>4</sup> District of Tambacounda, Ministry of Health and Social Action, Tambacounda, Senegal  
18 <sup>5</sup> Senegal National Malaria Control Programme, Ministry of Health and Social Action, Dakar,  
19 Senegal  
20 <sup>6</sup> US President's Malaria Initiative, United States Agency for International Development, Dakar,  
21 Senegal  
22 <sup>7</sup> Department of Infectious Disease Epidemiology, London School of Hygiene and Tropical  
23 Medicine, London, UK  
24 <sup>8</sup> Malaria Branch, US Centers for Disease Control and Prevention, Atlanta, Georgia, USA  
25 <sup>9</sup> PATH, Seattle, Washington, USA  
26 <sup>10</sup> Department of Disease Control, London School of Hygiene and Tropical Medicine, London  
27 UK  
28 <sup>11</sup> US President's Malaria Initiative, Malaria Branch, US Centers for Disease Control and  
29 Prevention, Atlanta, Georgia, USA  
30 <sup>12</sup> United States Public Health Service, Rockville, MD, USA  
31 <sup>13</sup> US President's Malaria Initiative, Malaria Branch, US Centers for Disease Control and  
32 Prevention, Dakar, Senegal, USA

33 \* Contributed equally

34 † Contributed equally

35 **Corresponding authors:**

Michelle E. Roh  
UCSF Institute for Global Health Sciences  
550 16th Street, 3rd Floor  
San Francisco, CA 94158, USA  
Email: [michelle.roh@ucsf.edu](mailto:michelle.roh@ucsf.edu)

El-hadji Konko Ciré Ba  
Université Iba Der Thiam de Thiès  
Grand Standing, Thiès  
BP: A967 Thiès  
Email: [el-hadj.ba@ird.fr](mailto:el-hadj.ba@ird.fr)

## 36 **Summary**

### 37 **Background**

38 In Africa, the scale-up of malaria control interventions, including seasonal malaria  
39 chemoprevention (SMC), has dramatically reduced malaria burden, but progress toward malaria  
40 elimination has stalled. We evaluated mass drug administration (MDA) as a strategy to  
41 accelerate reductions in malaria incidence in Senegal.

### 42 **Methods**

43 We conducted an open-label, cluster-randomised controlled trial in a low-to-moderate  
44 transmission setting of Tambacounda, Senegal. Eligible villages had a population size between  
45 200–800. All villages received pyrethroid-piperonyl butoxide bednets and proactive community  
46 case management of malaria at baseline. Sixty villages were randomised 1:1 to either three  
47 cycles of MDA with dihydroartemisinin-piperaquine+single-low dose primaquine administered  
48 to individuals aged  $\geq 3$  months, six-weeks apart starting the third week of June (intervention), or  
49 standard-of-care, which included three monthly cycles of SMC with sulfadoxine-  
50 pyrimethamine+amodiaquine administered to children aged 3–120 months starting end of July  
51 (control). MDA and SMC were delivered door-to-door. The primary outcome was clinical  
52 malaria incidence in all ages assessed during the peak transmission season (July-December), the  
53 year after intervention. Here, we report safety, coverage, and impact outcomes during the  
54 intervention year. The trial is registered at ClinicalTrials.Gov (NCT04864444).

### 55 **Findings**

56 Between June 21, 2021 and October 3, 2021, 6505, 7125, and 7250 participants were  
57 administered MDA and 3202, 3174, and 3146 participants were administered SMC across  
58 cycles. Coverage of  $\geq 1$  dose of MDA drugs was 79%, 82%, and 83% across cycles. During the  
59 transmission season of the intervention year, MDA was associated with a 55% [95% CI: 28%–  
60 72%] lower incidence of malaria compared to control (MDA: 93 cases/1000 population; control:  
61 173 cases/1000 population). No serious adverse events were reported in either arm.

### 62 **Interpretation**

63 In low-to-moderate malaria transmission settings with scaled-up malaria control interventions,  
64 MDA with dihydroartemisinin-piperaquine+single-low dose primaquine is effective and well-  
65 tolerated for reducing malaria incidence. Further analyses will focus on the sustainability of this  
66 reduction.

### 67 **Funding**

68 United States President's Malaria Initiative

### 69 **Keywords**

70 mass drug administration; seasonal malaria chemoprevention; dihydroartemisinin-piperaquine;  
71 primaquine; sulfadoxine-pyrimethamine; amodiaquine; Plasmodium falciparum; malaria;  
72 Senegal; transmission

73 **Word Count:** Summary (300); Manuscript (4488)

## 74 **Research in context**

### 75 *Evidence before this study*

76 The current World Health Organization (WHO) guidelines recommend that malaria programmes  
77 consider mass drug administration (MDA) for *Plasmodium falciparum* transmission reduction in  
78 low-to-very low transmission settings (broadly defined as parasite prevalence <10% or annual  
79 malaria incidence of <250 cases per population). In moderate-to-high transmission areas, MDA  
80 is recommended for rapid reduction of disease burden, but not for transmission reduction due to  
81 the lack of published studies demonstrating its short- or long-term benefits. Among the numerous  
82 studies that contributed to this recommendation, five evaluated the antimalarial combination,  
83 dihydroartemisinin-piperazine + single low-dose primaquine. However, none of the studies  
84 were conducted in countries implementing seasonal malaria chemoprevention as part of their  
85 routine malaria control strategy.

86 On January 23, 2024, we conducted a PubMed search using the following term: “mass drug  
87 administration” AND “dihydroartemisinin-piperazine”. We found one additional cluster  
88 randomised controlled trial conducted in a moderate transmission setting of The Gambia (an  
89 SMC-implementing country), that evaluated mass drug administration with the antimalarial  
90 combination, dihydroartemisinin-piperazine + ivermectin. This study demonstrated that MDA  
91 was associated with a 70% reduction in the odds of PCR-confirmed malaria two months after the  
92 last round of MDA. However, given the study demonstrated little evidence on entomological  
93 outcomes, authors concluded that much of the observed effect of MDA was likely attributable to  
94 the antimalarial efficacy of dihydroartemisinin-piperazine.

### 95 *Added value of this study*

96 Our study adds to the current evidence base demonstrating the benefits of MDA with  
97 dihydroartemisinin-piperazine + single-dose primaquine on malaria burden reduction and may  
98 have impacts on short-term transmission. Combined with The Gambia trial results, our study  
99 provides new evidence demonstrating that MDA with dihydroartemisinin-piperazine can have  
100 short-term benefits on transmission in low and moderate transmission settings where malaria  
101 transmission is highly seasonal.

### 102 *Implications of all the available evidence*

103 As countries in sub-Saharan and Sahelian Africa progressively scale-up their malaria control  
104 interventions, they will reach a plateau where no further gains can be made. In low and moderate  
105 transmission settings, MDA is a well-tolerated and effective intervention for rapidly reducing  
106 malaria burden and may have an impact on transmission in the short-term.

## 107 **Introduction**

108 Malaria is a major public health concern in Africa. In regions where transmission is highly  
109 seasonal, seasonal malaria chemoprevention (SMC) has been widely adopted to prevent  
110 morbidity and mortality in children at-risk of severe malaria. SMC involves the monthly  
111 administration of sulfadoxine-pyrimethamine + amodiaquine given during the peak transmission  
112 season to treat existing parasitaemia and prevent new infections.<sup>1</sup> Since its initial  
113 recommendation by the World Health Organisation (WHO) in 2012, SMC has expanded to 18  
114 African countries, covering 53 million children in 2023.<sup>2</sup> The scale-up of SMC has been  
115 successful, demonstrating reductions in childhood clinical malaria incidence by 60–88% under  
116 programmatic conditions.<sup>1,3</sup>

117 Through high coverage of SMC, strong vector control, and prompt case management, countries  
118 in Sahelian and sub-Saharan Africa have made significant strides in controlling malaria,  
119 prompting many to establish new goals for malaria elimination. However, recent progress toward  
120 elimination has stalled,<sup>4</sup> necessitating enhanced coverage of proven core interventions and the  
121 consideration of new interventions to rapidly reduce transmission. One promising approach is  
122 mass drug administration (MDA), which involves the administration of antimalarials to all  
123 individuals in a defined geographic area at a frequency and duration tailored to the local malaria  
124 epidemiology and goals. For MDA to have an impact on transmission, high coverage ( $\geq 80\%$ )<sup>5,6</sup>  
125 of the target population is needed, which requires an optimized delivery approach and strong  
126 community engagement.<sup>7</sup> Achieving high coverage may be less challenging in countries  
127 successfully implementing SMC, as they can leverage their existing infrastructure of door-to-  
128 door delivery and community and health system acceptance of chemoprevention.<sup>8,9</sup>

129 In addition to attaining high coverage, the effectiveness of MDA depends on the type of  
130 antimalarial regimen used. In *Plasmodium falciparum*-dominant regions, dihydroartemisinin-  
131 piperaquine is an attractive agent for MDA given its good safety profile, long prophylactic  
132 period, and relatively low-levels of artemisinin resistance in Africa.<sup>10,11</sup> However,  
133 dihydroartemisinin-piperaquine has no known efficacy against mature gametocytes<sup>12,13</sup>—the  
134 parasites responsible for human-to-mosquito transmission. Single low-dose primaquine is a  
135 gametocytocidal agent shown to be safe and associated with the near complete prevention of  
136 human-to-mosquito transmission.<sup>14,15</sup> It is likely that the combination of these drugs may confer  
137 greater benefits than dihydroartemisinin-piperaquine alone, allowing MDA to have a greater  
138 impact on transmission.

139 Here, we present results from a cluster randomised controlled trial assessing the safety, coverage,  
140 and short-term impact of three cycles of MDA with dihydroartemisinin-piperaquine + single  
141 low-dose primaquine on *P. falciparum* incidence and prevalence during the intervention year.  
142 This study aimed to fill a critical evidence gap regarding the effectiveness of MDA to rapidly  
143 reduce malaria burden in a highly seasonal, low-to-moderate transmission setting where malaria  
144 control measures have been scaled-up and additional interventions are needed to accelerate  
145 malaria elimination.

## 146 **Methods**

## 147 *Study setting*

148 The study was conducted in Tambacounda Health District of southeastern Senegal (**Appendix**  
149 **1**). The district is comprised of 523 villages with an estimated population size of 297,761 in  
150 2020. In southeastern Senegal, malaria transmission is low-to-moderate (50–200 cases per 1000  
151 population) and highly seasonal, with most cases occurring between July and December. In this  
152 region, the national malaria programme (*Programme National de Lutte contre le Paludisme*;  
153 PNLP) implements standard malaria control interventions including routine distribution of  
154 insecticide-treated nets, malaria case management at health facilities, SMC to children 3–120  
155 months of age (except those with a severe/chronic illness, known hypersensitivity to SMC drugs,  
156 and history of antimalarial receipt in the prior three weeks), and proactive community case  
157 management of fever through the *Prise en Charge à Domicile Plus* (PECADOM+) model. In the  
158 PECADOM+ model, community health workers, known as dispensateur de soins à domiciles  
159 (DSDOMs), conduct weekly household visits to identify and treat suspected malaria cases during  
160 the malaria transmission season. Despite scale-up of these interventions, progress toward  
161 transitioning these zones to pre-elimination status has been slow. Thus, in these areas, the  
162 program needs an accelerator intervention to aggressively push the elimination margins and meet  
163 the national goal to eliminate malaria by 2030.

## 164 *Study design and participants*

165 The study employed a two-arm, open-label, cluster randomised controlled trial design. Sixty  
166 villages were randomly selected for participation. Villages were eligible if they had a population  
167 size between 200–800; were located within a health post catchment area with an annual malaria  
168 incidence of 60–160 cases/1000 population; and had an established PECADOM+ system or the  
169 PEACDOM+ model was planned for implementation in the village. Villages were selected so  
170 that village centroids were  $\geq 2.5$  km apart.

171 Participant eligibility was assessed prior to each MDA cycle. Residents of intervention villages  
172 were eligible for MDA if they were  $\geq 3$  months of age and excluded if they reported a  
173 severe/chronic illness, had a known hypersensitivity to study drugs, were pregnant (confirmed by  
174 urine test), had taken drugs that could influence cardiac function or prolong QTc interval, or  
175 received antimalarials in the prior three weeks. Children  $< 2$  years of age and breastfeeding  
176 women were further excluded from receiving single low-dose primaquine. No SMC was  
177 provided during the intervention year in intervention villages.

178 Written informed consent was obtained before the first MDA cycle and cross-sectional surveys.  
179 Parental written informed consent was obtained from participants  $< 18$  years of age and written  
180 informed assent was obtained from children 13–17 years of age.

181 Ethical approval of this trial was granted by the Comité National d’Ethique pour la Recherche en  
182 Santé (CNERS) of Senegal and the University of California, San Francisco (UCSF) Human  
183 Research Protection Program. The U.S. Centers for Disease Control and Prevention approved  
184 reliance on UCSF. The trial was registered with ClinicalTrials.gov (NCT04864444) and  
185 oversight was provided by an independent data safety monitoring committee and external  
186 monitor. An interim safety analysis was conducted after the first MDA cycle.



## 187 *Randomisation and masking*

188 Study villages were randomised 1:1 to intervention or control. To ensure adequate balance with  
189 respect to specified variables, villages were stratified based on whether PECADOM+ was  
190 present at baseline. Then a constrained randomisation approach was undertaken using the  
191 following village-level covariates: health post of village, distance to health post, baseline malaria  
192 prevalence (assessed through a survey conducted at the end of the pre-intervention transmission  
193 season), village population size, and population size of children <10 years. A study investigator  
194 (MER) randomly generated intervention assignment. Participants, field team, and investigators  
195 were unblinded to allocation assignment. Laboratory technicians were blinded to intervention  
196 assignment.

## 197 *Procedures*

### 198 *Community mobilisation and sensitisation*

199 Upon village selection, the study team held meetings with administrative, health, and religious  
200 leaders of Tambacounda Health District to discuss the study aims, planned activities, and receive  
201 consent for study implementation. Community sensitisation materials were developed by the  
202 study team and implemented by local health staff. In the months prior to MDA, which coincided  
203 with the peak COVID-19 pandemic, additional social media campaigns, local community radio  
204 announcements, and television advertisements were conducted. Prior to each MDA cycle, town  
205 hall meetings and household visits were undertaken to ensure that the community was well-  
206 informed.

### 207 *Interventions*

208 In the control arm, the standard-of-care chemoprevention (which consisted of three cycles of  
209 SMC with sulfadoxine-pyrimethamine + amodiaquine) was administered to children aged 3-120  
210 months at four-week intervals, initiated at the presumed start of the malaria transmission season.  
211 In the intervention arm, three cycles of MDA with dihydroartemisinin-piperaquine + single low-  
212 dose primaquine were administered to individuals aged  $\geq 3$  months at six-week intervals. To  
213 achieve maximal impact on clearing the infectious reservoir,<sup>16,17</sup> MDA was initiated one month  
214 prior to the presumed start of the transmission season (**Figure 1**). Prior to intervention  
215 implementation, pyrethroid-piperonyl butoxide (PBO) bednets were distributed door-to-door to  
216 all study villages and year-round PECADOM+ was established to monitor malaria incidence.

217 MDA and SMC were delivered door-to-door by DSDOMs via directly observed therapy for all  
218 three doses. Study drugs were administered using an age-based dosing strategy per  
219 manufacturer's instructions (**Appendix 2**). For each MDA cycle, dihydroartemisinin-piperaquine  
220 (Eurartesim™, Sigma-Tau, Italy) was given for three consecutive days and single low-dose  
221 primaquine (Remedica Ltd, Limassol, Cyprus) was given with the first dose of  
222 dihydroartemisinin-piperaquine. For each SMC cycle, amodiaquine (Fosun Pharma, Shanghai,  
223 China) was given for three consecutive days and sulfadoxine-pyrimethamine (Fosun Pharma,  
224 Shanghai, China) was given with the first dose of amodiaquine. For participants who were

225 unable to swallow tablets (e.g., young children), tablets were crushed and mixed in water. If the  
226 participant vomited within 30 minutes of administration, the full dose was re-administered. If the  
227 re-administered dose was vomited within 30–60 minutes, half the dose was administered.

228 During drug administration, individuals with symptomatic malaria confirmed by a histidine-rich  
229 protein 2-based rapid diagnostic test (RDT) (ParaHIT®-f, ARKRAY Healthcare Pvt Ltd, Surat,  
230 India) were treated with artemether-lumefantrine and did not receive study drugs until the  
231 subsequent cycle.

### 232 *Malaria surveillance*

233 Malaria cases were captured through health facility and PECADOM+ registries. Suspected cases  
234 (i.e., presentation of fever or history of fever in the past 48 hours) were confirmed by RDT. To  
235 ensure high-quality capture of incident cases, PECADOM+ was expanded year-round  
236 implementation in all study villages and fully scaled-up by March 1, 2021. Data were collected  
237 on paper-based registries and abstracted onto electronic databases. Duplicates between registries  
238 were removed. Village-level population size was estimated by averaging estimates from two  
239 censuses conducted before-and-after intervention implementation (**Figure 1**).

### 240 *Pharmacovigilance*

241 Passive and active pharmacovigilance systems were used to monitor the safety of MDA. For  
242 passive surveillance, adverse events (AEs) following drug intake were recorded by study staff or  
243 DSDOMs into standardised case report forms. Participants were encouraged to inform local  
244 health or study staff if they experienced an AE within one month after drug intake. AEs were  
245 graded by a study clinician (e.g., mild, moderate, or severe) and managed free of charge. For  
246 active surveillance monitoring, the study staff surveyed 220 random households per study arm on  
247 the day after the last dose of study drugs. Households were sampled from every village,  
248 proportionate to village population size, such that five households were sampled from villages  
249 with <300 residents and ten households from villages with  $\geq 300$  residents. In intervention  
250 villages, the study team randomly sampled three members per household according to their age  
251 group: <5, 5–15, and  $\geq 15$  years. In control villages, three household members <10 years of age  
252 were randomly sampled. Survey participants were asked if they experienced an AE and to  
253 describe the event, including type, onset date, and duration. Severity was graded by a study  
254 clinician.

### 255 *Cross-sectional surveys*

256 To determine parasite prevalence, cross-sectional surveys were conducted at the end of the  
257 transmission season before-and-after intervention implementation (December 10–20, 2020 and  
258 December 9–21, 2021). A two-stage cluster sampling strategy was undertaken to randomly select  
259 households and household members from all villages. Participants were asked about their  
260 demographic characteristics, malaria prevention measures, and history of fever. Suspected  
261 malaria cases were confirmed by RDT and those with a positive test were treated with  
262 artemether-lumefantrine. A fingerprick blood sample was taken for microscopy and for dried  
263 blood spots (DBS) to confirm parasitaemia by PCR and to genotype drug resistance markers.

## 264 *Laboratory analysis*

265 Microscopy slides and DBS from surveys were transported to Université Iba Der Thiam de  
266 Thiès. Slides were stained with 6% Giemsa for 20 min and read by two microscopists. A third  
267 reviewer settled discrepant findings. Parasite DNA was extracted from DBS using the Chelex-  
268 100 extraction method<sup>18</sup> and tested for parasitemia by real-time PCR using species-specific  
269 primers based on 18S rRNA gene as previously described.<sup>19</sup> PCR-positive samples were  
270 genotyped to assess the presence of point mutations in the *pfK13*, *pfdhps*, *pfdhfr*, *pfcr*, and  
271 *pfmdr1* genes using high-resolution melting analysis as previously described.<sup>20</sup>

## 272 *Study outcomes*

273 The primary outcome of the trial was village-level malaria incidence in the year after  
274 intervention implementation. Here, we report the impact of MDA on incidence during the  
275 transmission season of the implementation year. Village-level malaria incidence was defined as  
276 the number of RDT-confirmed symptomatic malaria cases detected through health post and  
277 PECADOM+ surveillance divided by the average village population size obtained from two  
278 censuses performed before-and-after intervention implementation (**Figure 1**). Secondary  
279 outcomes included parasite prevalence by microscopy and PCR, coverage and safety of MDA,  
280 and prevalence of drug resistance markers assessed through cross-sectional surveys.

281 Coverage was defined according to WHO guidelines<sup>7</sup>. For each chemoprevention campaign, a  
282 pre-intervention census was used to generate a registry that determined who would be targeted  
283 for each cycle. Data on adherence and dose were recorded for each person and day. The registry  
284 was updated throughout the campaign to identify new residents, deaths, and emigrants. Both  
285 crude and distributional coverage are reported. Crude coverage was defined as the proportion of  
286 residents who received  $\geq 1$  dose of study drugs among study residents. Denominator included  
287 absences, refusals, and those who did not meet the eligibility criteria. Distribution coverage was  
288 defined as the proportion of residents who received  $\geq 1$  dose among eligible residents, thereby  
289 excluding pregnant women and those with a self-reported illness. Both coverage metrics  
290 excluded deaths and emigrants.

## 291 *Statistical analysis*

292 All analyses were conducted using Stata version 17.0 or R version 4.2.2. Sample size  
293 calculations were based on detecting a 50% relative difference in RDT-confirmed malaria  
294 incidence between arms in the year post-intervention. We assumed mass distribution of  
295 pyrethroid-PBO bednets, SMC, and scale-up of community case management would  
296 cumulatively reduce annual malaria incidence by 50% in the control arm from 100 to 50  
297 cases/1000 population before-and-after intervention implementation. Based on a coefficient of  
298 variation of 0.80 and an average cluster size of 250, a sample size of 60 clusters provided 80%  
299 power (using a 5% significance level) to detect a 50% relative difference in the MDA arm  
300 (intervention effect) using a two-tailed alpha test.



301 Analyses were carried out using an intention-to-treat approach. Intervention impact on incidence  
302 was assessed using mixed-effects Poisson regression with village-level random intercepts. In the  
303 unadjusted model, the following indicator variables were included: a treatment indicator that  
304 equalled 1 in intervention villages during the implementation year and 0 otherwise and a time  
305 variable that equalled 1 during the implementation year and 0 otherwise. Adjusted analyses  
306 included covariates used in the stratified constrained randomization scheme. Intervention impact  
307 was defined as the percent reduction in incidence between July and December in the intervention  
308 arm compared to the control arm ( $1 - \text{incidence rate ratio (IRR)}_{\text{intervention}} * 100\%$ ). Intervention  
309 effects on parasite prevalence were estimated using Poisson regression with robust standard  
310 errors. Survey weights accounting for number of households and household size were  
311 incorporated into prevalence analyses. Prespecified subgroup analyses were conducted by age  
312 group (e.g.,  $\geq$  or  $<10$  years of age), DSDOM presence at baseline, and baseline transmission  
313 intensity (low versus moderate; low defined as parasite prevalence  $<10\%$  as defined by WHO<sup>1</sup>)  
314 using two-way interaction terms between treatment and subgroup variables.

## 315 **Results**

316 Between September 1, 2020 and October 25, 2020, 523 villages in the study area were  
317 geolocated and screened for eligibility, and 111 met the inclusion criteria (**Figure 2**). Of these,  
318 60 villages were randomly selected allowing for a  $\geq 2.5$  km distance between village centroids  
319 and randomised to intervention or control. Village-level factors included in the constrained  
320 randomisation were balanced across arms (**Table 1**). Overall, coverage of pyrethroid-PBO  
321 bednets was high (98%) and similar between arms. In the pre-intervention year, 81% of children  
322  $<10$  years of age reported receiving the most recent cycle of SMC and 71% reported receiving all  
323 three cycles. Twenty percent reported sleeping away from their home in the past 15 days.

324 In the intervention arm, 8931, 9571, and 9703 residents were screened for the first, second, and  
325 third cycle of the MDA campaign. Distribution coverage of single low-dose primaquine (where  
326 the denominator excluded ineligible residents) was 79% (6286/7992), 82% (6949/8462), and  
327 84% (7199/8575) across the three cycles. Distribution coverage of  $\geq 1$  dose of  
328 dihydroartemisinin-piperaquine among the eligible individuals was 79% (6505/8229), 82%  
329 (7125/8673), and 83% (7250/8690) in the first, second, and third cycles. Distribution coverage of  
330 all three doses of dihydroartemisinin-piperaquine was 74%, 79%, and 81% across cycles.  
331 Distribution coverage was higher in those  $<10$  years compared to  $\geq 10$  years (distribution  
332 coverage of  $\geq 1$  dose was 85%, 86%, and 87% in  $<10$  years across cycles, and 75%, 80%, and  
333 81% in  $\geq 10$  years across cycles). Crude coverage of  $\geq 1$  dose of dihydroartemisinin-piperaquine  
334 was 73%, 74%, and 75% across cycles. By village, distribution coverage ranged from 58%–97%;  
335 50%, 67%, and 70% of intervention villages reached the WHO target coverage of  $\geq 80\%$  in the  
336 first, second, and third cycles, respectively (**Appendix 3**). The major reasons for non-  
337 participation were absence (range: 14%–21%) and illness (range: 5%–7%) (**Appendix 4**).  
338 Absences were similar between males and females (1·12:1 ratio) and in age to those who  
339 received MDA (16 years [interquartile range (IQR): 7–26] versus 13 years [IQR: 6–27]).  
340 Refusals were rare (1%–2%) and mostly among males (70%) with a median age of 22 years  
341 [IQR: 15–30].

342 In the control arm, 3492, 3489, and 3487 children aged 3–120 months were screened for the first,  
343 second, and third SMC cycle. Distribution coverage of  $\geq 1$  dose of SMC drugs was 93%  
344 (3202/3457), 92% (3174/3442), and 92% (3146/3434) across cycles. Distribution coverage for  
345 all three SMC doses was 92%, 92%, and 91% across cycles. Crude coverage of  $\geq 1$  dose was  
346 92%, 91%, and 90% across cycles. By village, distribution coverage ranged from 62%–100%;  
347 93% of SMC villages reached  $\geq 80\%$  coverage across all cycles (**Appendix 3**). Major reasons for  
348 non-receipt of SMC were absence (7%) and illness (1%–2%) (**Appendix 4**). Refusals of SMC  
349 were low across cycles ( $\leq 1\%$ ).

350 During the pre-intervention transmission season (July–December 2020), malaria incidence was  
351 181 and 204 cases/1000 population in the intervention and control arms, respectively (**Table 2**).  
352 In the transmission season of the intervention year (July–December 2021), malaria incidence  
353 reduced to 93 cases/1000 population in the intervention arm and to 173 cases/1000 population in  
354 the control arm (**Table 2; Figure 3**). The unadjusted intervention effect of MDA was 52% [95%  
355 CI: 21%, 71%]. The adjusted intervention effect, which accounted for variables included in the  
356 constrained randomisation was 55% [95% CI: 28%, 72%].

357 Pre-specified subgroup analyses showed evidence of an interaction by age group; the adjusted  
358 intervention effect was 58% [95% CI: 33%, 74%] in the  $\geq 10$  years age group and 46% [95% CI:  
359 10%, 67%] in the  $< 10$  years age group ( $p_{\text{interaction}}=0.016$ ) (**Table 2; Figure 3**). The impact of  
360 MDA on malaria incidence was similar in low and moderate transmission settings defined as  
361 microscopy parasite prevalence of  $< 10\%$  versus  $\geq 10\%$  (adjusted intervention effect=55% [31%,  
362 71%] versus 52% [-19%, 81%];  $p_{\text{interaction}}=0.88$ ) (**Table 2; Figure 3**).

363 By microscopy, parasite prevalence decreased between 2020 and 2021, from 6.1% to 1.8% in the  
364 intervention arm and from 6.7% to 4.7% in the control arm (adjusted intervention effect=62%  
365 [95% CI: 22%, 80%]) (**Table 3**). The impact of MDA differed between the  $< 10$  and  $\geq 10$  years  
366 age group (adjusted intervention effect=76% [95% CI: 42%, 90%] versus 51% [95% CI: -14%,  
367 79%]), but this finding did not reach statistical significance ( $p_{\text{interaction}}=0.17$ ). By PCR, parasite  
368 prevalence decreased between 2020 and 2021, from 17.9% to 4.5% in the intervention arm and  
369 19.9% to 8.3% in the control arm (adjusted intervention effect=47% [95% CI: 3%, 71%]). The  
370 effect of MDA differed between the  $< 10$  and  $\geq 10$  years age groups: adjusted intervention  
371 effect=71% [95% CI: 35%, 87%] and 33% [95% CI: -27%, 65%], respectively ( $p_{\text{interaction}}=0.050$ ).  
372 The impact of MDA on microscopy- or PCR-confirmed parasite prevalence did not significantly  
373 differ between low and moderate transmission settings ( $p_{\text{interaction}}$  for microscopy-confirmed  
374 prevalence=0.73,  $p_{\text{interaction}}$  for PCR-confirmed prevalence=0.73) (**Table 3**).

375 In both passive and active pharmacovigilance systems, the frequency of AEs reduced with each  
376 subsequent cycle and no serious adverse events (SAEs) were detected in either arm (**Appendix**  
377 **5; Table 4**). Through passive surveillance, 129 AEs were observed in 67/20 887 (0.003%)  
378 participants of the intervention arm and four AEs were observed in 2/9524 (0.0002%)  
379 participants of the control arm; all were mild (**Appendix 5**). Both the frequency and proportion  
380 of participants who experienced an AE were higher in the intervention arm compared to the  
381 control arm ( $p < 0.0001$ ). The most common AEs found in the intervention arm were  
382 gastrointestinal issues (45.7%), headaches (25.6%), and fever (17.1%).

383 Through active surveillance, more participants of the intervention arm reported an AE compared  
384 to the control arm (13.7% versus 9.4%;  $p < 0.0001$ ) (**Table 4**). Among children aged  $< 10$  years,  
385 the proportion of reported AEs were similar between arms (10.1% versus 9.4%;  $p = 0.57$ ). In the  
386 intervention arm, the most common AEs were gastrointestinal issues (41.2%), fever (22.7%), and  
387 headaches (11.8%). Of the 498 AEs reported in the intervention arm, 64.1% were mild, 32.9%  
388 were moderate, and 3.0% were severe. Severe AEs included fever ( $n = 7$ ), headache ( $n = 4$ ),  
389 drowsiness ( $n = 1$ ), vomiting ( $n = 1$ ), diarrhoea ( $n = 1$ ), and loss of appetite ( $n = 1$ ). All AEs appeared  
390 three hours after drug intake, resolved within 72 hours, and did not require hospitalization. No  
391 cases of anaemia were found through either passive or active surveillance.

392 Of the 597 PCR-positive samples collected from surveys, 433 were successfully genotyped to  
393 determine molecular markers of antimalarial resistance (**Appendix 6**). Mutations associated with  
394 intermediate resistance to SP (PfDHFR N51I, C59R, S108N and PfDHPS A437G) were seen at  
395 high proportions (range: 58%–100%). PfDHFR I164L was seen at proportions of 2%–12%.  
396 None of the studied mutations differed in proportions between arms or time periods. There was  
397 no evidence of PfDHPS K540E, PfDHPS A581G, or PfK13 C580Y mutations.

## 398 **Discussion**

399 We conducted a cluster randomised controlled trial evaluating the safety, coverage, and short-  
400 term effectiveness of three rounds of MDA with dihydroartemisinin-piperazine + single low-  
401 dose primaquine in a low-to-moderate transmission setting of Senegal where malaria control  
402 interventions were scaled-up through pyrethroid-PBO bednet distribution, three monthly SMC  
403 cycles, and expansion of year-round proactive community case management of malaria. During  
404 the trial intervention year, malaria incidence and parasite prevalence reduced in both arms, likely  
405 due in part to pyrethroid-PBO bednet distribution. In intervention villages, MDA was associated  
406 with a 55% and 62% reduction in malaria incidence and microscopy-confirmed parasite  
407 prevalence. Subgroup analyses showed that MDA had a substantial impact on incidence and  
408 parasite prevalence in those  $< 10$  and  $\geq 10$  years of age and in both low and moderate transmission  
409 settings. Overall, MDA was well-tolerated; most AEs were mild or moderate and no cases of  
410 anaemia or SAEs were observed.

411 While the trial was not designed to separately estimate MDA's effect on transmission versus its  
412 direct, prophylactic effect, there was some evidence to suggest that MDA indirectly affected  
413 transmission. First, subgroup analyses demonstrated that among children under ten, MDA was  
414 associated with a 46% reduction in incidence as compared to children under ten in the control  
415 arm who received SMC. We expect that this reduction is unlikely by differences in the  
416 prophylactic effects of these drugs given we expect dihydroartemisinin-piperazine and  
417 sulfadoxine-pyrimethamine + amodiaquine to have similar protective efficacies,<sup>11</sup> MDA covered  
418 less of the transmission season, and MDA had slightly lower coverage than SMC in under tens.  
419 Moreover, MDA's impact on parasite prevalence further supports this reasoning, given the  
420 endline survey was conducted more than two months after the last cycle of drug administration  
421 when the prophylactic effects of both MDA and SMC drugs would have waned.

422 Our study has several important findings/caveats. First, our monthly incidence analyses (**Figure**  
423 **4**) revealed that SMC should have started one month later and both chemoprevention campaigns

424 should have been extended to four cycles to cover the entire transmission season. If this had this  
425 been done, the impact of MDA in children under tens might not have been as substantial.  
426 Second, our findings may not be generalisable to most settings deploying SMC where the  
427 malaria burden is mostly moderate-to-high. While our study found MDA was associated with  
428 reductions in malaria burden and short-term transmission, evidence of its sustained benefit and  
429 cost-effectiveness is needed before considering MDA as an intermediate intervention to  
430 accelerate malaria elimination.

431 The WHO currently recommends MDA for transmission reduction in very low-to-low  
432 transmission settings (i.e., parasite prevalence of <10% or incidence <250 cases/1000  
433 population). This recommendation is based on evidence from eight cluster randomised controlled  
434 trials which found MDA can have a substantial, but short-term impact in these settings.<sup>1,21,22</sup>  
435 However, MDA is not recommended for transmission reduction in moderate-to-high  
436 transmission settings, based on evidence from two cluster randomised trials and two non-  
437 randomized studies which did not show significant short- or long-term impacts on prevalence or  
438 incidence. Our study provides new evidence indicating MDA may have a short-term impact on  
439 transmission in both low and moderate transmission strata. Our findings are consistent with a  
440 recent trial conducted in a moderate transmission setting of The Gambia<sup>23</sup> which demonstrated a  
441 70% reduction in the odds of PCR-confirmed infection two months after the last MDA cycle.  
442 Evidence from these two studies should be considered when determining future  
443 recommendations in moderate transmission settings.

444 There were several strengths of the study, including our large sample size, rigorous monitoring  
445 of safety, and achievement of high coverage. By the final MDA cycle, 70% (21/30) of villages  
446 reached the WHO target for MDA coverage ( $\geq 80\%$ )<sup>7</sup>, despite significant operational challenges  
447 in door-to-door drug administration amidst the peak of the global COVID-19 pandemic. The  
448 high coverage observed in our study was likely attributable to community acceptance of annual  
449 SMC campaigns, established infrastructure of community case management, support from key  
450 administrative and health authorities, and repeated community sensitisation campaigns.  
451 However, absences were common during MDA cycles (14-21%), especially among adolescents  
452 and young adults who are generally asymptomatic and known to be important drivers of  
453 transmission.<sup>24</sup> Thus, in order to sustain gains made, future MDA campaigns will need to  
454 consider additional strategies to reach these groups in order to prevent malaria importation and  
455 potential resurgence after MDA.

456 Our study had a few limitations. First, as explained earlier, SMC was not optimally timed,  
457 making it difficult to draw direct comparisons between SMC and MDA for burden reduction in  
458 children. Second, baseline incidence was likely non-differentially mismeasured in villages where  
459 DSDOMs were absent at the start of the study (33% of villages). While the stratified  
460 randomization scheme balanced this factor between arms, this may have biased our effect  
461 estimates toward the null (see **Appendix 7** for analyses restricted to villages with prior  
462 PECADOM+). Third, given baseline incidence was likely mismeasured, subgroup analyses by  
463 baseline malaria incidence were not reported. Fourth, parasitological confirmation of malaria  
464 incidence relied on RDT which could have resulted in false positives potentially biasing our  
465 effect estimates toward the null. Fifth, MDA was conducted for only one year and additional  
466 cycles may have been needed to reach pre-elimination status (i.e., incidence <5 cases/1000

467 population). Finally, the current analyses only evaluated short-term impact. After discontinuation  
468 of MDA, there is potential for malaria to rebound, and analyses of longer-term impact and cost-  
469 effectiveness from an additional year of follow-up of these cohorts are forthcoming which will  
470 help to determine the sustainability of MDA.

471 In low-to-moderate malaria transmission settings, where transmission is seasonal and coverage  
472 of standard malaria control interventions is high, we demonstrated that three cycles of MDA with  
473 dihydroartemisinin-piperaquine + single-low dose primaquine could safely and rapidly reduce  
474 malaria burden and potentially have a short-term impact on transmission. However, future work  
475 investigating whether the impact of MDA can be sustained, and its cost-effectiveness is needed  
476 to inform countries of the potential of MDA as an intervention to accelerate toward elimination.



## 477 **Role of the funding source**

478 The study was funded under the US President's Malaria Initiative Impact Malaria Consortium.  
479 The funders participated in the design of the study and reviewed the manuscript prior to  
480 submission. The funders had no role in data collection and data analysis. The first authors had  
481 full access to the study data and final responsibility for the decision to submit the manuscript.

## 482 **Acknowledgements**

483 We are grateful to the community of Tambacounda Health District for their participation in the  
484 study. We thank the health workers, district health staff, the PNL, and research team at  
485 Université Iba Der Thiam de Thiès for their contributions in implementing the study and to PMI  
486 Vectorlink for conducting pyrethroid-PBO bednet distribution and the early village population  
487 census. We also thank our data safety and monitoring board members Prof Umberto  
488 D'Alessandro (chair), Prof Jean Guadart, Prof Menno R Smit, Dr Houda Sefiani, and Dr Thomas  
489 J Peto for their guidance and oversight of the study. We would also like to thank Drs Meera  
490 Venkatesan, Meghna Desai, and Leah Moriarty for their contributions in the early protocol  
491 development and study planning, Dr Mame Birame Diouf for his initial coordination and  
492 strategic engagement of in-country partners, Drs Jean Biyik and Abdoulaye Diop for their  
493 support in coordinating the pyrethroid-PBO bednet distribution, and Dr Hannah Slater for  
494 providing the mathematical modelling analysis used for our sample size calculations.

## 495 **Contributions**

496 JH conceived of the study and wrote the first draft of the protocol. RG, JLN, MER, AB, KSR,  
497 JT, EBKC, FB, ST, ID, and ABG contributed to the protocol and approved of the final version.  
498 EBKC, AD, TG, AS, ST, SG, ACL, ED, ID, OGB, and JLN implemented the study. JLN,  
499 EBKC, AD, TG, ABG, ST, KSR, MER, MSH, TK, MH, EE, RG, DS, and FB provided  
500 oversight of the study. ACL conducted laboratory analysis of samples. The statistical analysis  
501 plan was developed by MSH, PM, AF, MER, AB, EBKC, and JLN and data were analysed by  
502 AF with XW, MER, AS, and EBKC. MER, EBKC, AF, XW, PM, AB, JH, KSR, MSH, and JLN  
503 interpreted the results. MER, EBKC, MSH, and JLN wrote the first draft of the manuscript. PM,  
504 JH, AF, and KSR provided additional inputs to the writing. All authors reviewed and approved  
505 the final manuscript before submission.

## 506 **Declaration of interests**

507 The study was funded by the US President's Malaria Initiative. MER is supported by the Eunice  
508 Kennedy Shriver National Institute of Child Health & Human Development of the National  
509 Institutes of Health (Award Number K99HD111572). JH and ABG receive salary support from  
510 the US President's Malaria Initiative. The findings and conclusions in this report are those of the  
511 authors and do not necessarily represent the official position of the National Institutes of Health,  
512 US Centers of Disease Control and Prevention, and the US Agency for International  
513 Development.

514 **Data sharing**

515 De-identified data may be available upon reasonable request and approval from Principal  
516 Investigators via a data sharing agreement.

## 517 **References**

- 518 1. World Health Organization. WHO guidelines for malaria, 3 June 2022: World Health  
519 Organization, 2022.
- 520 2. SMC Alliance. 53 million children living in 18 countries covered with Seasonal Malaria  
521 Chemoprevention in 2023. April 5, 2024 2024. [https://www.smc-alliance.org/53-million-](https://www.smc-alliance.org/53-million-children-living-in-18-countries-covered-with-seasonal-malaria-chemoprevention-in-2023)  
522 [children-living-in-18-countries-covered-with-seasonal-malaria-chemoprevention-in-2023](https://www.smc-alliance.org/53-million-children-living-in-18-countries-covered-with-seasonal-malaria-chemoprevention-in-2023)  
523 (accessed July 17, 2024).
- 524 3. Cairns M, Ceesay SJ, Sagara I, et al. Effectiveness of seasonal malaria chemoprevention  
525 (SMC) treatments when SMC is implemented at scale: Case–control studies in 5 countries. *PLoS*  
526 *Med* 2021; **18**(9): e1003727.
- 527 4. World Health Organization. World Malaria Report 2022. Geneva, Switzerland: World  
528 Health Organization; 2022.
- 529 5. Newby G, Hwang J, Koita K, et al. Review of mass drug administration for malaria and  
530 its operational challenges. *Am J Trop Med* 2015; **93**(1): 125.
- 531 6. Shah MP, Hwang J, Choi L, Lindblade KA, Kachur SP, Desai M. Mass drug  
532 administration for malaria. *The Cochrane Database of Systematic Reviews* 2021; **2021**(9).
- 533 7. World Health Organization. Mass drug administration for falciparum malaria: a practical  
534 field manual. 2017.
- 535 8. Cairns ME, Sagara I, Zongo I, et al. Evaluation of seasonal malaria chemoprevention in  
536 two areas of intense seasonal malaria transmission: secondary analysis of a household-  
537 randomised, placebo-controlled trial in Houndé District, Burkina Faso and Bougouni District,  
538 Mali. *PLoS Med* 2020; **17**(8): e1003214.
- 539 9. NDiaye J, Cissé B, Ba E, et al. Safety of seasonal malaria chemoprevention (SMC) with  
540 sulfadoxine-pyrimethamine plus amodiaquine when delivered to children under 10 years of age  
541 by district health services in Senegal: results from a stepped-wedge cluster randomized trial.  
542 *PLoS One* 2016; **11**(10): e0162563.
- 543 10. Gutman J, Kovacs S, Dorsey G, Stergachis A, Ter Kuile FO. Safety, tolerability, and  
544 efficacy of repeated doses of dihydroartemisinin-piperaquine for prevention and treatment of  
545 malaria: a systematic review and meta-analysis. *Lancet Infect Dis* 2017; **17**(2): 184-93.
- 546 11. Zongo I, Milligan P, Compaore YD, et al. Randomized noninferiority trial of  
547 dihydroartemisinin-piperaquine compared with sulfadoxine-pyrimethamine plus amodiaquine for  
548 seasonal malaria chemoprevention in Burkina Faso. *Antimicrob Agents Chemother* 2015; **59**(8):  
549 4387-96.
- 550 12. Dicko A, Roh ME, Diawara H, et al. Efficacy and safety of primaquine and methylene  
551 blue for prevention of Plasmodium falciparum transmission in Mali: a phase 2, single-blind,  
552 randomised controlled trial. *Lancet Infect Dis* 2018; **18**(6): 627-39.
- 553 13. Sawa P, Shekalaghe SA, Drakeley CJ, et al. Malaria transmission after artemether-  
554 lumefantrine and dihydroartemisinin-piperaquine: a randomized trial. *J Infect Dis* 2013; **207**(11):  
555 1637-45.
- 556 14. World Health Organization. Policy brief on single-dose primaquine as a gametocytocide  
557 in Plasmodium falciparum malaria: World Health Organization, 2015.
- 558 15. Stepniewska K, Humphreys GS, Gonçalves BP, et al. Efficacy of single-dose primaquine  
559 with artemisinin combination therapy on Plasmodium falciparum gametocytes and transmission:  
560 an individual patient meta-analysis. *J Infect Dis* 2022; **225**(7): 1215-26.

- 561 16. Eisele TP, Bennett A, Silumbe K, et al. Short-term impact of mass drug administration  
562 with dihydroartemisinin plus piperaquine on malaria in Southern Province Zambia: a cluster-  
563 randomized controlled trial. *J Infect Dis* 2016; **214**(12): 1831-9.
- 564 17. Griffin JT. The interaction between seasonality and pulsed interventions against malaria  
565 in their effects on the reproduction number. *PLoS Comput Biol* 2015; **11**(1): e1004057.
- 566 18. Amoah LE, Opong A, Ayanful-Torgby R, Abankwa J, Acquah FK. Prevalence of G6PD  
567 deficiency and Plasmodium falciparum parasites in asymptomatic school children living in  
568 southern Ghana. *Malar J* 2016; **15**(1): 1-8.
- 569 19. Rougemont M, Van Saanen M, Sahli R, Hinrikson HP, Bille J, Jatou K. Detection of four  
570 Plasmodium species in blood from humans by 18S rRNA gene subunit-based and species-  
571 specific real-time PCR assays. *J Clin Microbiol* 2004; **42**(12): 5636-43.
- 572 20. Chomarat M, Breyse F. Technique d'analyse des courbes de fusion haute résolution  
573 (FHR) ou High Resolution Melting analysis (HRM) en infectiologie. *Immuno-Anal Biol Spe*  
574 2011; **26**(4): 207-11.
- 575 21. Schneider ZD, Shah MP, Boily MC, et al. Mass Drug Administration to Reduce Malaria  
576 Transmission: A Systematic Review and Meta-Analysis. *Am J Trop Med* 2023: tpm220766-  
577 tpm2.
- 578 22. Malaria Policy Advisory Committee. Meeting report of the Evidence Review Group on  
579 mass drug administration, mass screening and treatment and focal screening and treatment for  
580 malaria (20–22 April 2015). Geneva, Switzerland, 2015.
- 581 23. Dabira ED, Soumare HM, Conteh B, et al. Mass drug administration of ivermectin and  
582 dihydroartemisinin–piperaquine against malaria in settings with high coverage of standard  
583 control interventions: a cluster-randomised controlled trial in The Gambia. *Lancet Infect Dis*  
584 2022; **22**(4): 519-28.
- 585 24. Rek J, Blanken SL, Okoth J, et al. Asymptomatic school-aged children are important  
586 drivers of malaria transmission in a high endemicity setting in Uganda. *J Infect Dis* 2022; **226**(4):  
587 708-13.
- 588

589 **Figures**

**Figure 1.** Timeline of study activities

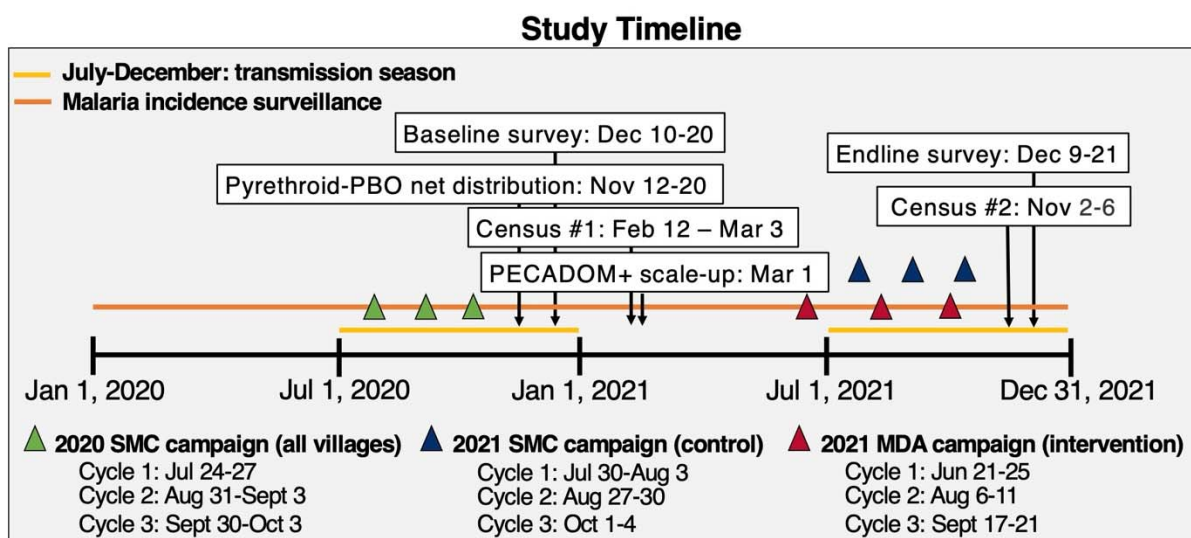

Abbreviations: MDA = mass drug administration; PBO = piperonyl butoxide; PECADOM+ = Prise en Charge à Domicile Plus (i.e., proactive community case management of malaria); SMC = seasonal malaria chemoprevention



590 **Figure 2.** Trial profile

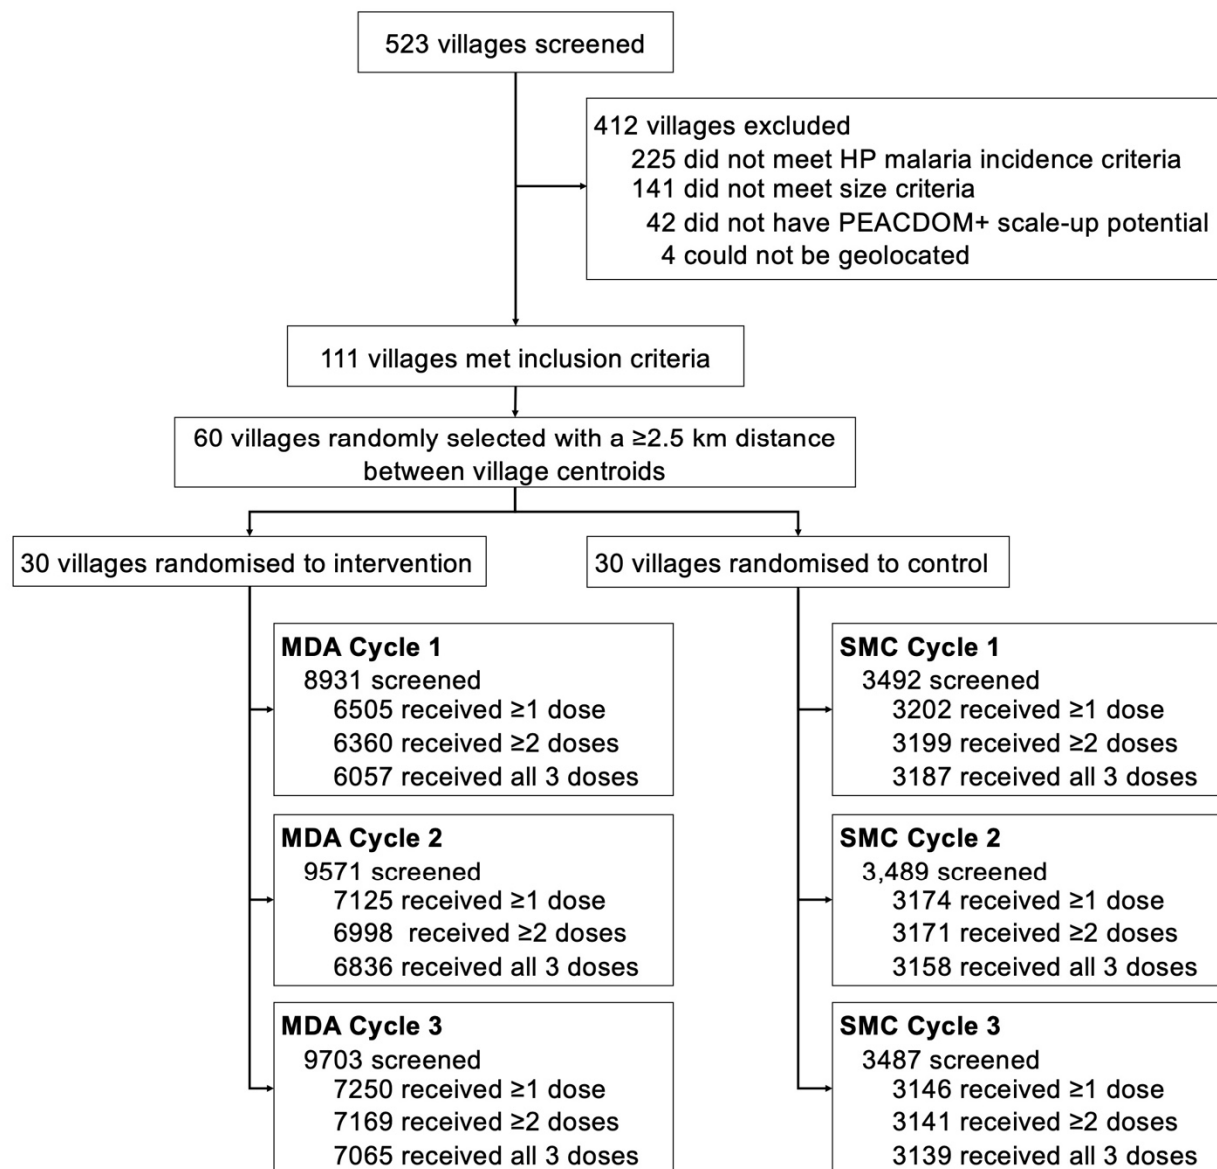

Abbreviations: HP = health post; MDA = mass drug administration; PEACDOM+ = Prise en Charge à Domicile Plus (i.e., proactive community case management of malaria); SMC = seasonal malaria chemoprevention

591 **Figure 3.** Graphical representation of village-level monthly incidence of symptomatic malaria  
 592 during the intervention implementation year by intervention group (A) and stratified by age  
 593 group (B), and baseline transmission intensity (C).

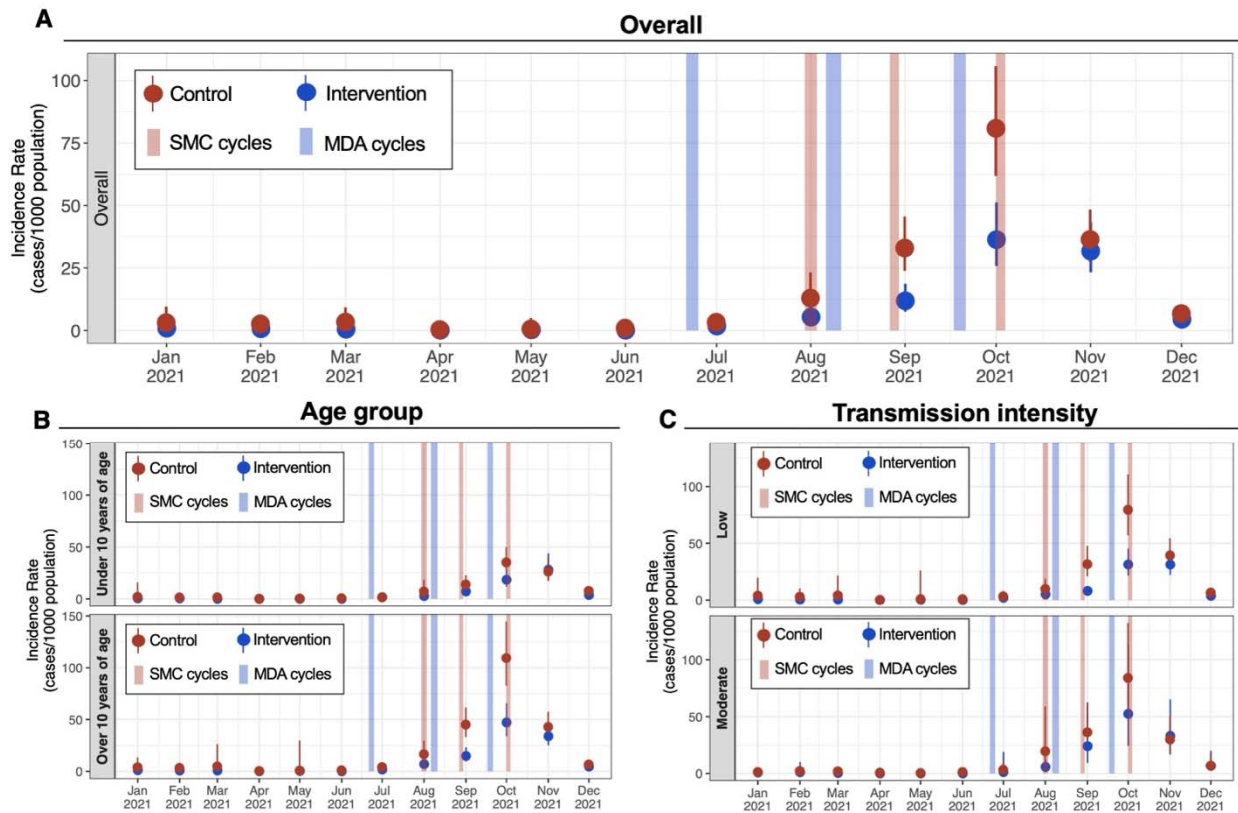

Abbreviations: MDA = mass drug administration; SMC = seasonal malaria chemoprevention  
 Monthly incidence rates and corresponding 95% confidence intervals, represented by points and bars, respectively, were calculated using a random effects Poisson model with village-level random intercepts to account for clustered observations.

594 **Tables**

595 **Table 1.** Trial profile

| Characteristics                                                     | Total      | Intervention (MDA) | Control    |
|---------------------------------------------------------------------|------------|--------------------|------------|
| <b>Village-level<sup>1</sup></b>                                    |            |                    |            |
| Number of clusters (villages)                                       | 60         | 30                 | 30         |
| Villages by health post, n (%)                                      |            |                    |            |
| Bohe                                                                | 9 (15%)    | 6 (20%)            | 3 (10%)    |
| Dar Salam                                                           | 2 (3%)     | 1 (3%)             | 1 (3%)     |
| Dawadi                                                              | 14 (23%)   | 6 (20%)            | 8 (27%)    |
| Koussanar                                                           | 9 (15%)    | 5 (17%)            | 4 (13%)    |
| Missirah                                                            | 6 (10%)    | 2 (7%)             | 4 (13%)    |
| Neteboulou                                                          | 5 (8%)     | 2 (7%)             | 3 (10%)    |
| Sinthiou Maleme                                                     | 15 (25%)   | 8 (27%)            | 7 (23%)    |
| Presence of DSDOM prior to the study, n (%)                         |            |                    |            |
| No                                                                  | 20 (33%)   | 10 (33%)           | 10 (33%)   |
| Yes                                                                 | 40 (67%)   | 20 (67%)           | 20 (67%)   |
| Distance to health post in km, mean (SD)                            | 14.8 (8.4) | 14.9 (8.6)         | 14.6 (8.3) |
| Population size in 2019 <sup>2</sup> , mean (SD)                    | 322 (168)  | 330 (170)          | 315 (168)  |
| Population size <10 years of age in 2019 <sup>2</sup> , mean (SD)   | 119 (62)   | 120 (63)           | 117 (62)   |
| % Population <10 years of age in 2019, mean (SD)                    | 37% (5)    | 36% (4)            | 37% (6)    |
| Baseline microscopy prevalence (%), mean (SD)                       | 8% (8)     | 7% (9)             | 9% (8)     |
| <b>Individual-level Characteristics from Baseline Survey, n (%)</b> |            |                    |            |
| Participant age in years                                            |            |                    |            |
| <10 years of age                                                    | 783 (33%)  | 373 (32%)          | 410 (35%)  |
| ≥10 years of age                                                    | 1578 (67%) | 809 (68%)          | 769 (65%)  |
| Participant sex                                                     |            |                    |            |
| Male                                                                | 1180 (50%) | 576 (49%)          | 604 (51%)  |
| Female                                                              | 1182 (50%) | 607 (51%)          | 575 (49%)  |
| Slept away from home in the past 15 days                            |            |                    |            |
| Yes                                                                 | 459 (20%)  | 245 (21%)          | 214 (19%)  |
| No                                                                  | 1846 (80%) | 910 (79%)          | 936 (81%)  |
| Type of bed net used                                                |            |                    |            |
| None                                                                | 37 (2%)    | 28 (2%)            | 9 (1%)     |
| Pyrethroid-PBO ITN                                                  | 2282 (98%) | 1131 (96%)         | 1151 (99%) |
| Non-pyrethroid-PBO ITN                                              | 21 (1%)    | 20 (2%)            | 1 (0.1%)   |
| Received the most recent cycle of SMC? <sup>3</sup>                 |            |                    |            |
| No                                                                  | 169 (20%)  | 94 (23%)           | 75 (17%)   |
| Yes                                                                 | 687 (81%)  | 316 (77%)          | 371 (83%)  |
| Completed all three cycles of SMC in 2020? <sup>3</sup>             |            |                    |            |
| No                                                                  | 248 (29%)  | 128 (31%)          | 120 (27%)  |
| Yes                                                                 | 610 (71%)  | 284 (69%)          | 326 (73%)  |

Abbreviations: ITN = insecticide-treated net; MDA = mass drug administration; PBO = piperonyl butoxide; SD = standard deviation; SMC = seasonal malaria chemoprevention

<sup>1</sup> Village-level variables used in constrained randomization scheme.

<sup>2</sup> Incidence estimates provided by Tambacounda Regional District Office.

<sup>3</sup> Assessed only among children <10 years of age.

596 **Table 2.** RDT-confirmed malaria incidence and intervention effectiveness estimates during peak transmission season (July-December)

| Study outcomes                               | Average incidence per 1,000 (events / population) |                   |                    |                    | Intervention effect, 1-ratio of IRRs [95% CI] <sup>1</sup> |                       |
|----------------------------------------------|---------------------------------------------------|-------------------|--------------------|--------------------|------------------------------------------------------------|-----------------------|
|                                              | Intervention (MDA)                                |                   | Control            |                    | Unadjusted                                                 | Adjusted <sup>2</sup> |
|                                              | 2020                                              | 2021              | 2020               | 2021               |                                                            |                       |
| <b>Primary outcome</b>                       |                                                   |                   |                    |                    |                                                            |                       |
| Incidence among all ages                     | 181<br>(2067/10745)                               | 93<br>(924/10745) | 204<br>(1883/9641) | 173<br>(1751/9641) | 52% [21%, 71%]                                             | 55% [28%, 72%]        |
| <10 years old                                | 133<br>(514/4091)                                 | 84<br>(287/4091)  | 154<br>(515/3598)  | 120<br>(463/3598)  | 43% [3%, 66%]                                              | 46% [10%, 67%]        |
| ≥10 years and older                          | 213<br>(1553/6637)                                | 100<br>(633/6637) | 236<br>(1368/5991) | 206<br>(1287/5991) | 55% [27%, 73%]                                             | 58% [33%, 74%]        |
| <b>Subgroup analyses</b>                     |                                                   |                   |                    |                    |                                                            |                       |
| Among children <10 years of age              |                                                   |                   |                    |                    |                                                            |                       |
| <5 years of age                              | 102<br>(163/1939)                                 | 69<br>(115/1939)  | 133<br>(208/1723)  | 93<br>(166/1723)   | 29% [-35%, 62%]                                            | 31% [-25%, 62%]       |
| 5 to <10 years of age                        | 85<br>(351/2152)                                  | 61<br>(172/2152)  | 118<br>(307/1875)  | 85<br>(297/1875)   | 43% [-4%, 69%]                                             | 45% [4%, 68%]         |
| Baseline transmission intensity <sup>3</sup> |                                                   |                   |                    |                    |                                                            |                       |
| Low (<10%)                                   | 172<br>(1508/8316)                                | 83<br>(658/8316)  | 228<br>(1385/6463) | 171<br>(1085/6463) | 53% [25%, 71%]                                             | 55% [31%, 71%]        |
| Moderate (≥10%)                              | 214<br>(559/2429)                                 | 125<br>(266/2429) | 148<br>(498/3178)  | 178<br>(666/3178)  | 49% [-48%, 82%]                                            | 52% [-19%, 81%]       |

Abbreviations: IRR = incidence rate ratio; MDA = mass drug administration

<sup>1</sup> Intervention effect estimated using mixed effects Poisson regression with village-level random intercepts.

<sup>2</sup> Adjusted for DSDOM at baseline, village population size of children <10 years of age, distance from health post, baseline parasite prevalence by microscopy, and village population size in 2019, and presence of DSDOM at time of case detection.

<sup>3</sup> Transmission intensity was defined as baseline village-level microscopy-confirmed parasite prevalence of <10% for “Low” transmission clusters and ≥10% for “Moderate” transmission clusters. 23 clusters from the intervention arm and 21 clusters from the control arm contributed to “Low” category; 7 clusters in intervention arm and 9 clusters in control arm contributed to “Moderate” category.

597 **Table 3.** Secondary outcomes of parasite prevalence.

| Outcomes                                     | Mean prevalence, % [95% CI] <sup>1</sup> |                       |                         |                         | Intervention effect,<br>1-ratio of PRs [95% CI] <sup>1</sup> |                       |
|----------------------------------------------|------------------------------------------|-----------------------|-------------------------|-------------------------|--------------------------------------------------------------|-----------------------|
|                                              | Intervention (MDA)                       |                       | Control                 |                         | Unadjusted                                                   | Adjusted <sup>2</sup> |
|                                              | 2020                                     | 2021                  | 2020                    | 2021                    |                                                              |                       |
| <b>Microscopy-detected infections</b>        |                                          |                       |                         |                         |                                                              |                       |
| All ages                                     | 6.1%<br>[2.8%, 9.4%]                     | 1.8%<br>[0.8%, 2.9%]  | 6.7%<br>[4.0%, 9.4%]    | 4.7%<br>[2.5%, 6.9%]    | 61% [21%, 81%]                                               | 62% [22%, 80%]        |
| < 10 years old                               | 8.2%<br>[2.7%, 13.7%]                    | 1.3%<br>[0.2%, 2.4%]  | 7.3%<br>[3.1%, 11.6%]   | 4.5%<br>[2.0%, 7.0%]    | 76% [41%, 90%]                                               | 76% [42%, 90%]        |
| ≥ 10 years and older                         | 5.1%<br>[2.6%, 7.7%]                     | 2.2%<br>[0.7%, 3.6%]  | 6.4%<br>[3.9%, 8.8%]    | 4.8%<br>[1.8%, 7.9%]    | 50% [-16%, 79%]                                              | 51% [-14%, 79%]       |
| Baseline transmission intensity <sup>3</sup> |                                          |                       |                         |                         |                                                              |                       |
| Low (<10%)                                   | 2.6%<br>[1.3%, 3.9%]                     | 1.0%<br>[0.2%, 1.8%]  | 3.4%<br>[2.1%, 4.8%]    | 4.3%<br>[1.4%, 7.2%]    | 63% [-1%, 86%]                                               | 62% [0%, 86%]         |
| Moderate (≥10%)                              | 18.8%<br>[9.4%, 28.2%]                   | 5.0%<br>[2.1%, 7.8%]  | 17.1%<br>[12.5%, 21.8%] | 6.0%<br>[3.4%, 8.6%]    | 54% [18%, 73%]                                               | 56% [22%, 75%]        |
| <b>PCR-detected infections</b>               |                                          |                       |                         |                         |                                                              |                       |
| All ages                                     | 17.9%<br>[11.3%, 24.4%]                  | 4.5%<br>[2.5%, 6.4%]  | 19.9%<br>[11.8%, 28.1%] | 8.3%<br>[4.8%, 11.7%]   | 46% [-3%, 70%]                                               | 47% [3%, 71%]         |
| < 10 years old                               | 18.6%<br>[10.9%, 26.4%]                  | 2.3%<br>[0.6%, 3.9%]  | 19.6%<br>[9.9%, 29.4%]  | 5.1%<br>[2.2%, 8.0%]    | 71% [34%, 87%]                                               | 71% [35%, 87%]        |
| ≥ 10 years and older                         | 17.5%<br>[11.0%, 24.0%]                  | 5.8%<br>[2.9%, 8.6%]  | 20.1%<br>[11.7%, 28.5%] | 10.2%<br>[5.2%, 15.3%]  | 33% [-27%, 64%]                                              | 33% [-27%, 65%]       |
| Baseline transmission intensity <sup>3</sup> |                                          |                       |                         |                         |                                                              |                       |
| Low (<10%)                                   | 14.0%<br>[7.9%, 20.1%]                   | 3.0%<br>[1.0%, 5.0%]  | 14.3%<br>[6.3%, 22.3%]  | 4.7%<br>[2.4%, 6.9%]    | 48% [-4%, 74%]                                               | 47% [-7%, 74%]        |
| Moderate (≥10%)                              | 32.0%<br>[11.4%, 52.5%]                  | 9.9%<br>[6.1%, 13.7%] | 38.0%<br>[21.7%, 54.4%] | 18.7%<br>[12.2%, 25.3%] | 37% [2%, 59%]                                                | 40% [9%, 60%]         |

Abbreviations: MDA = mass drug administration; PCR = polymerase chain reaction; PR = prevalence ratio

<sup>1</sup> Intervention effect estimated using Poisson regression with robust standard errors. Survey weights incorporated to account for two-stage sampling design (by household and household size).

<sup>2</sup> Adjusted for variables included in constrained randomisation: presence of DSDOM at baseline, village population size of children <10 years of age, distance from health post, and village population size in 2019.

<sup>3</sup> Transmission intensity was defined as baseline village-level microscopy-confirmed parasite prevalence of <10% for “Low” transmission clusters and ≥10% for “Moderate” transmission clusters. 23 clusters from the intervention arm and 21 clusters from the control arm contributed to “Low” category; 7 clusters in intervention arm and 9 clusters in control arm contributed to “Moderate” category.



598 **Table 4.** Safety outcomes monitored through active surveillance.

| Active Surveillance                       | Intervention (MDA) | Control (SMC)   | p-value <sup>1</sup> |
|-------------------------------------------|--------------------|-----------------|----------------------|
| <b>Among all participants surveyed</b>    |                    |                 |                      |
| Participants with any AE, n/N (%)         |                    |                 |                      |
| All cycles                                | 260/1903 (13.7%)   | 152/1616 (9.4%) | <0.0001              |
| First cycle                               | 124/619 (20.0%)    | 93/569 (16.3%)  | 0.10                 |
| Second cycle                              | 94/628 (15.0%)     | 51/563 (9.1%)   | 0.002                |
| Third cycle                               | 42/656 (6.4%)      | 8/484 (1.7%)    | <0.0001              |
| Frequency of adverse events, n            |                    |                 |                      |
| All cycles                                | 498                | 310             | --                   |
| First cycle                               | 229                | 175             | --                   |
| Second cycle                              | 181                | 119             | --                   |
| Third cycle                               | 88                 | 16              | --                   |
| Most common adverse events, n/N (%)       |                    |                 |                      |
| Gastrointestinal issues <sup>2</sup>      | 205/498 (41.2%)    | 144/310 (46.5%) | 0.16                 |
| Fever                                     | 113/498 (22.7%)    | 109/310 (35.2%) | <0.001               |
| Headaches                                 | 59/498 (11.8%)     | 20/310 (6.5%)   | 0.017                |
| Drowsiness                                | 26/498 (5.2%)      | 8/310 (2.6%)    | 0.102                |
| Other                                     | 95/498 (19.1%)     | 29/310 (9.4%)   | <0.001               |
| Severity of AEs, n/N (%)                  |                    |                 |                      |
| Mild                                      | 319/498 (64.1%)    | 178/310 (57.4%) | 0.059                |
| Moderate                                  | 164/498 (32.9%)    | 118/310 (38.1%) | 0.14                 |
| Severe                                    | 15/498 (3.0%)      | 14/310 (4.5%)   | 0.26                 |
| Any serious AE, n/N (%)                   | 0/498 (0%)         | 0/310 (0%)      | --                   |
| <b>Among children &lt;10 years of age</b> |                    |                 |                      |
| Participants with any AE, n/N (%)         |                    |                 |                      |
| All cycles                                | 85/841 (10.1%)     | 145/1544 (9.4%) | 0.57                 |
| First cycle                               | 36/259 (13.9%)     | 90/547 (16.5%)  | 0.35                 |
| Second cycle                              | 33/271 (12.2%)     | 47/529 (8.9%)   | 0.14                 |
| Third cycle                               | 16/311 (5.1%)      | 8/468 (1.7%)    | 0.007                |
| Frequency of adverse events, n            |                    |                 |                      |
| All cycles                                | 176                | 296             | --                   |
| First cycle                               | 68                 | 170             | --                   |
| Second cycle                              | 67                 | 110             | --                   |
| Third cycle                               | 41                 | 16              | --                   |
| Most common adverse events, n/N (%)       |                    |                 |                      |
| Gastrointestinal issues <sup>2</sup>      | 87/176 (49.4%)     | 136/296 (45.9%) | 0.523                |
| Fever                                     | 50/176 (28.4%)     | 106/296 (35.8%) | 0.121                |
| Headache                                  | 10/176 (5.7%)      | 19/296 (6.4%)   | 0.901                |
| Drowsiness                                | 2/176 (1.1%)       | 8/296 (2.7%)    | 0.334                |
| Other                                     | 27/176 (15.3%)     | 27/296 (9.1%)   | 0.0057               |
| Severity of AEs, n/N (%)                  |                    |                 |                      |
| Mild                                      | 102/176 (58.0%)    | 169/296 (57.1%) | 0.86                 |
| Moderate                                  | 69/176 (39.2%)     | 115/296 (38.9%) | 0.94                 |
| Severe                                    | 5/176 (2.8%)       | 12/296 (4.1%)   | 0.49                 |
| Any serious AE, n/N (%)                   | 0/176 (0%)         | 0/296 (0%)      | --                   |

Abbreviations: AE = adverse event

<sup>1</sup> P-value computed using Chi-squared test or Fisher's exact test (if frequency of any cell value was <5)

<sup>2</sup> Defined as one of the following AEs: nausea, vomiting, diarrhoea, abdominal pain, or loss of appetite.
